# Supplementary material
Source: Springer Nature journal article supplement (https://www.springermedizin.de/resource/supplementary/12961_2014_351_MOESM1_ESM.pdf/9571114)
Supplement: MOESM1 [file 9571114]

Outline applications for primary research received by the commissioned funding stream of HTA programme 2006 – 2009 (n=347)

Data were excluded from the study for commissioning briefs where no applications were shortlisted (n=47)

(n=300)

Outline proposals asked to resubmit excluded from the study (n=3)

(n=297)

Outline proposal from country not eligible for funding excluded from the study (n=1)

(n=296)

DATA EXTRACTION (n=296)

Statistical analysis

Shortlisting decision

Not shortlisted (n=167)

Shortlisted (n=129)

Data excluded (n=39) where for particular commissioning briefs shortlisting outcomes were all positive. Statistical analysis performed on n = [296-39] =257 applications of which 90 were shortlisted

Funding decision

Not Funded (n=69)

Funded (n=60)

Data excluded (n=21) where for particular commissioning briefs where funding outcomes were either all positive or all negative. Statistical analysis performed on n = [257-21] =236 applications of which 53 were funded
